# Supplementary material
Source: publisher figshare collection journal article supplement (https://karger.figshare.com/ndownloader/files/27539105)
Supplement: Supplementary file 1 [file 27539105]

| No | Age(year) | Sex | HGB（g/L） | PLT(× 109/L) |
| --- | --- | --- | --- | --- |
| cITP  1  2  3  4  5  6  7  8  9  10  11  12  13  14  15  16  17  18  19  20  21  22  23  24  25  26  27  28  29  30  31  32  33  34  35  36  37  38  39  40  Healthy  1  2  3  4  5  6  7  8  9  10  11  12  13  14  15  16  17  18  19  20  21  22  23  24  25  26  27  28  29  30  31  32  33  34  35  36  37  38  39  40 | 36  28  21  46  49  20  35  36  24  49  37  46  28  29  30  33  47  46  41  28  23  36  44  22  38  42  39  21  29  38  39  47  27  23  39  46  31  40  29  37  32  41  26  27  33  29  46  26  29  38  21  30  36  27  26  45  29  22  31  36  35  48  21  42  36  33  21  28  20  49  41  22  24  36  37  39  42  29  43  25 | Male  Female  Female  Female  Female  Female  Female  Female  Female  Female  Female  Female  Female  Female  Female  Female  Female  Female  Female  Female  Female  Female  Female  Female  Female  Female  Female  Female  Female  Female  Female  Female  Female  Female  Female  Female  Female  Female  Female  Female  Male  Female  Female  Female  Female  Female  Female  Female  Female  Female  Female  Female  Female  Female  Female  Female  Female  Female  Female  Female  Female  Female  Female  Female  Female  Female  Female  Female  Female  Female  Female  Female  Female  Female  Female  Female  Female  Female  Female  Female | 117  120  136  108  129  134  119  116  103  121  131  118  120  109  113  118  123  107  119  111  130  115  113  126  114  129  110  127  103  119  113  127  125  118  132  109  124  116  105  126  133  140  126  127  119  136  124  120  118  106  138  123  120  118  142  132  133  140  124  118  127  108  139  134  126  116  134  126  134  118  124  135  112  125  122  130  118  129  133  125 | 12  9  36  6  24  40  11  13  5  37  42  24  33  16  27  24  36  15  28  20  37  19  17  30  23  34  17  32  8  21  23  34  38  26  43  13  37  22  9  36  236  251  198  280  320  156  207  174  157  198  267  235  213  257  198  218  275  263  227  208  168  233  268  207  216  186  179  237  237  213  164  178  194  271  179  296  263  254  183  226 |

Principal reagents.

| Reagent | Manufacturer |
| --- | --- |
| Prostaglandin E1  HEPES  Arachidonic acid | Meiya Pharma Co., Ltd, HangZhou, China  SunShine Biotechnology Co., Ltd, NanJing, China  Sigma-aldrich Co., Ltd, ShangHai, China |
| IgG1-FITC  IgG1-PE  Mouse monoclonal anti-human CD61-PE  Rabbit anti-human P2Y1 antibody  Rabbit anti-human P2Y12 antibody  Rabbit anti-human α2A-AR antibody  Rabbit anti-human G protein antibody  Mouse anti-human PAR-1 antibody  Mouse anti-human PAR-4 antibody  PBS | Beckman Coulter Co., Ltd., CA, U.S.A.  Beckman Coulter Co., Ltd., CA, U.S.A.  Beckman Coulter Co., Ltd., CA, U.S.A.  Santa Cruz Biotechnology, Inc., U.S.A.  Santa Cruz Biotechnology, Inc., U.S.A.  Acris Antibodies, Inc., Germany  Abcam Inc., England  Abcam Inc., England  Abcam Inc., England  OuMeng Medical Diagnostics Co., Ltd, BeiJing, China |

Principal instruments and apparatuses.

| Instrument | Manufacturer |
| --- | --- |
| EPICSXL-MCL flow cytometer  EXPO32 ADC analysis software  Gel-Pro 4.0 analysis software  Vertical electrophoresis system  Spectrophotometer  Semi-dry blotting system  Cross linking machine (UV)  PTC-200 PCR  Desktop centrifuge  Vertical refrigerator  Vortex oscillator  pH meter  Electronic balance | Beckman Coulter Co., Ltd., CA, U.S.A.  Beckman Coulter Co., Ltd., CA, U.S.A.  Media Cybernetics, Co., Ltd., U.S.A.  Bio-Rad Co., Ltd., U.S.A.  Bio-Rad Co., Ltd., U.S.A.  Bio-Rad Co., Ltd., U.S.A.  Bio-Rad Co., Ltd., U.S.A.  MJ Research Co., Ltd., U.S.A.  Biofuge Prime R Co., Ltd., U.S.A.  Hualing Technology Group Co., Ltd.,  GuangZhou, China  HuaLiDa Experimental Equipment Co., Ltd.,  TaiChang, China  CORNING Co., Ltd., New York, U.S.A.  Sartorius Co., Ltd., Hamburg, Germany |
